# Supplementary material for: Medium-chain fatty acids modulate myocardial function via a cardiac odorant receptor
Source: Springer Nature journal article supplement (doi:10.1007/s00395-017-0600-y), 2017-01-23
Supplement: MOESM1 [file 12015808]

## Supplementary material

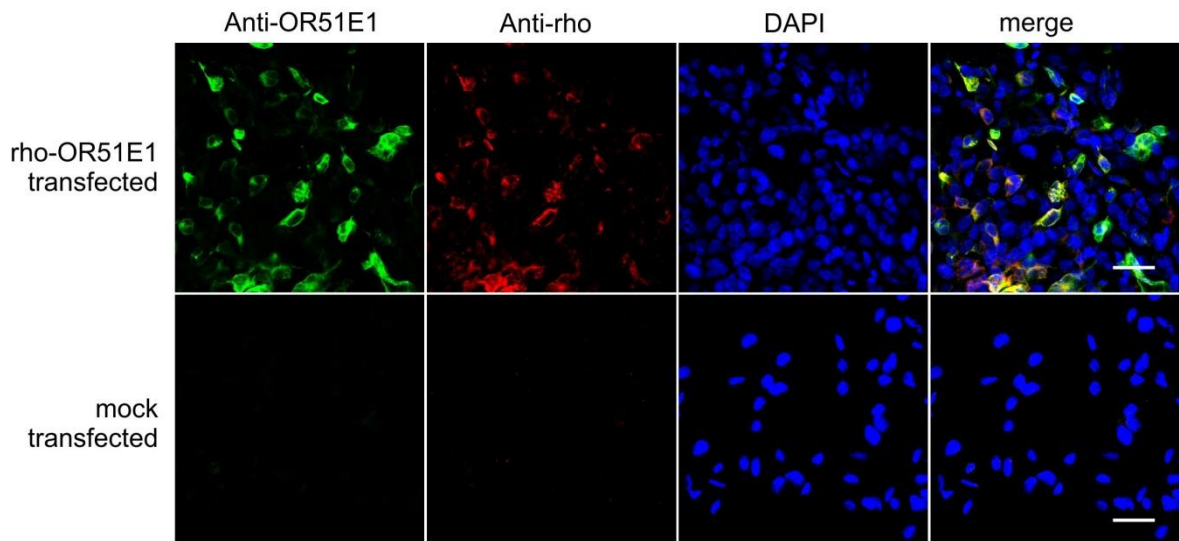

**Figure S1. Co-immunocytochemical staining of Hana3A cells transiently expressing OR51E1 with a N-terminal rho-tag, which consists of the first 20 amino acids of rhodopsin.** The recombinant rho-OR51E1-protein was detected using an antibody against OR51E1 (green) and an antibody against the n-terminal rho-tag (red). Confocal micrographs of the OR51E1 staining in OR51E1-expressing Hana3A cells are shown. Mock transfected Hana3A cells served as a negative control. Cell nuclei were stained with 4',6-diamidino-2-phenylindole (DAPI). Co-labeling (yellow) of OR51E1-expressing Hana3A cells indicates specificity of the used anti-OR51E1 antibody. Bar indicates 50  $\mu$ m.

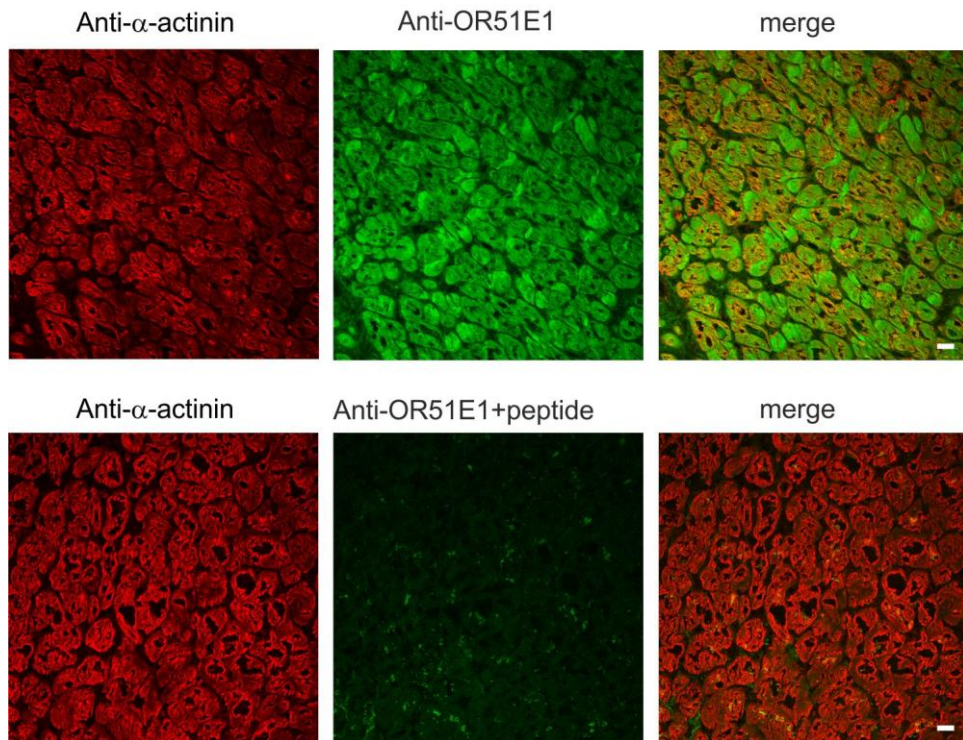

**Figure S2. Detection of OR51E1 protein in ventricular myocytes by immunohistochemical staining.** Shown are confocal micrographs of OR51E1 immunostaining obtained using an OR51E1 specific antibody in transversal cryosections of human left ventricle. Cardiomyocytes were identified by co-staining with an  $\alpha$ -actinin-detecting antibody. Specificity of OR51E1-antibody labeling was controlled by blocking with immunizing OR51E1 peptide (lower panel). Bar indicates 15  $\mu$ m.

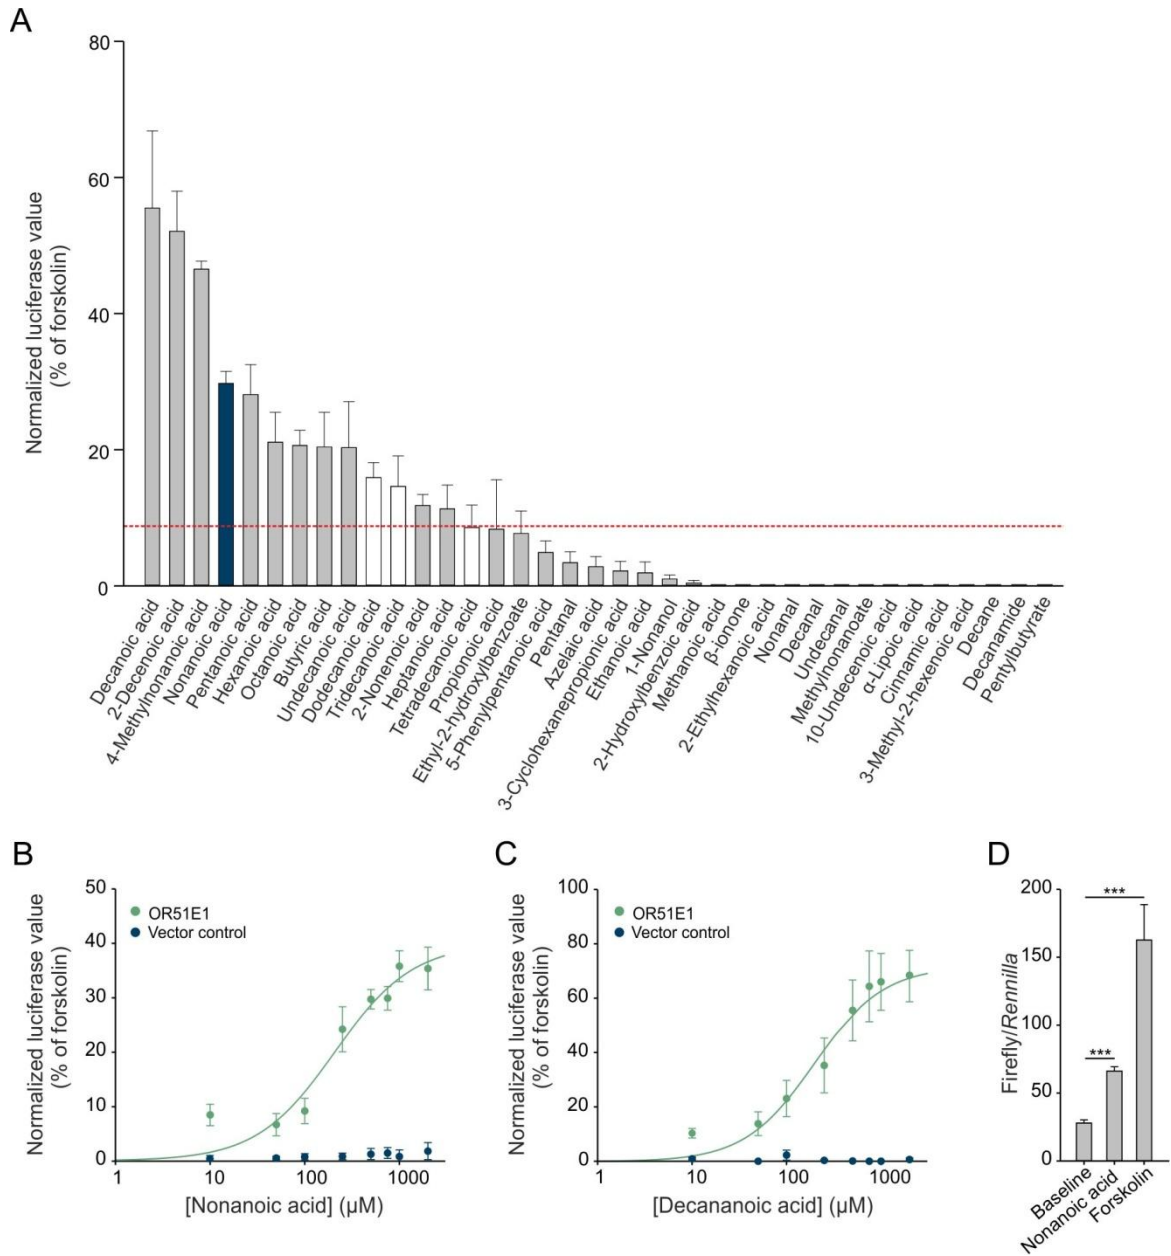

**Figure S3. Ligand spectrum of OR51E1.** **A** Structurally related molecules were tested in luciferase reporter assay for their ability to activate heterologously expressed OR51E1, using nonanoic acid as a template (blue bar). An odorant concentration of 500  $\mu$ M was used (exception: dodecanoic acid [250  $\mu$ M], tridecanoic acid [250  $\mu$ M], tetradecanoic acid [100  $\mu$ M]; because higher concentrations of odorant were not soluble; white bar). Red dashed line represents the response threshold. Bars represent the means of three experiments. Error bars represent the SEM. **B&C** Concentration-response relationships of nonanoic acid (B) and decanoic acid (C) as measured by Luciferase Reporter assays of Hana3A cells heterologously expressing OR51E1. Cellular activation was averaged from 4 biological replicates and normalized to the positive stimulus forskolin, error bars represent the SEM. Regression based on a 4-parameter Hill-Fit. Mock-transfected cells (Vector control) were stimulated to exclude unspecific responses. **D** Unnormalized data measured by Luciferase Reporter assays of Hana3A cells heterologously expressing OR51E1 stimulated with nonanoic acid (200  $\mu$ M), forskolin and unstimulated cells to demonstrate the baseline value. Bars represent the ratio of firefly luminescence values and *Renilla* luminescence values. The data are shown as the means  $\pm$  SEM (n=3 independent transfections). Significance was calculated by Student's t-test (\*\*\*) p<0.001).

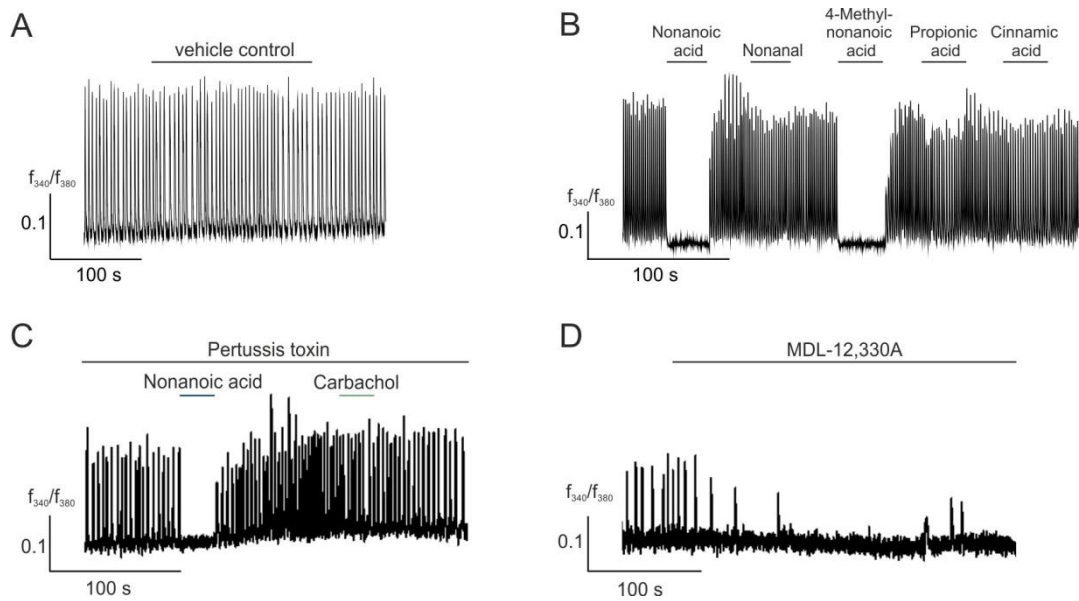

**Figure S4. Representative Ca<sup>2+</sup> imaging traces.** **A** The Ca<sup>2+</sup> imaging trace of stem cell-derived cardiomyocytes is representative for the vehicle controls (0.1 % DMSO). Application of the solvent did not result in any changes in cytosolic Ca<sup>2+</sup>. Cytosolic Ca<sup>2+</sup> levels were monitored as the integrated  $f_{340}/f_{380}$  fluorescence ratio expressed as a function of time. **B** Representative Ca<sup>2+</sup> imaging trace of exemplary selected odorants (500  $\mu$ M) that activate heterologously expressed OR51E1 (nonanoic acid and 4-methylnonanoic acid) and odorants that are inactive (nonanal, cinnamic acid and propionic acid). The receptive field of heterologously expressed OR51E1 was in accord with the effects on stem cell-derived cardiomyocytes. Cytosolic Ca<sup>2+</sup> levels were monitored as the integrated  $f_{340}/f_{380}$  fluorescence ratio expressed as a function of time. **C** Representative Ca<sup>2+</sup> imaging traces of stem cell-derived cardiomyocytes treated with G<sub>i</sub> protein inhibitor pertussis toxin. After pre-incubation (3 h) with pertissis toxin (1  $\mu$ g/ml), the carbachol (10  $\mu$ M)-induced reduction in Ca<sup>2+</sup> transients was abolished, but the nonanoic acid (500  $\mu$ M)-induced reduction remained unaffected (left panel). **D** Representative Ca<sup>2+</sup> imaging traces of stem cell-derived cardiomyocytes treated with an inhibitor that affects spontaneous Ca<sup>2+</sup> transients (adenylyl cyclase inhibitor MDL-12,330A, 20  $\mu$ M).

**Table S1. Odorant library**

| Name                        | Manufacturer              | Name                    | Manufacturer  |
|-----------------------------|---------------------------|-------------------------|---------------|
| 10-Undecenoic acid          | Symrise                   | Dodecanoic acid         | Henkel AG     |
| 1-Nonanol                   | Symrise                   | Ethanoic acid           | Henkel AG     |
| 2-Decenoic acid             | Henkel AG                 | Ethyl-2-hydroxybenzoate | Sigma-Aldrich |
| 2-Ethylhexanoic acid        | Symrise                   | Heptanoic acid          | Henkel AG     |
| 2-Hydroxybenzoic acid       | Symrise                   | Hexanoic acid           | Sigma-Aldrich |
| 2-Nonenoic acid             | Symrise                   | Methanoic acid          | Symrise       |
| 3-Cyclohexanepropionic acid | Symrise                   | Methylnonanoate         | Symrise       |
| 3-Methyl-2-hexenoic acid    | Symrise                   | Nonanal                 | Symrise       |
| 4-Methylnonanoic acid       | Sigma-Aldrich             | Nonanoic acid           | Sigma-Aldrich |
| 5-Phenylpentanoic acid      | Sigma-Aldrich             | Octanoic acid           | Sigma-Aldrich |
| $\alpha$ -Lipoic acid       | Symrise                   | Pentanal                | Henkel AG     |
| $\beta$ -Ionone             | Symrise                   | Pentanoic acid          | Sigma-Aldrich |
| Azelaic acid                | Symrise                   | Pentylbuturate          | Symrise       |
| Butyric acid                | Sigma-Aldrich             | Propionic acid          | Sigma-Aldrich |
| Cinnamic acid               | Symrise                   | Tetradecanoic acid      | Sigma-Aldrich |
| Decane                      | Sigma-Aldrich             | Tridecanoic acid        | Henkel AG     |
| Decanal                     | Sigma-Aldrich             | Undecanal               | Symrise       |
| Decanamide                  | Symrise                   | Undecanoic acid         | Sigma-Aldrich |
| Decanoic acid               | Symrise/<br>Sigma-Aldrich |                         |               |

**Table S2. Structure activity relationship for the negative inotropic effect of selected odorants in slice preparations of explanted human ventricles.**

Application of DMSO (vehicle control) did not result in significant changes of isometric contraction. Stimulation with odorants (1 mM) that activate heterologously expressed OR51E1 rapidly reduced twitch amplitude. The effect of short fatty acids ( $C \leq 7$ ) declined within the 4 min of application. The effectivity of highly potent odorants could be demonstrated also at 100  $\mu$ M concentrations. Odorants that did not activate heterologously expressed OR51E1 or the constitutive receptors of stem cell-derived cardiomyocytes also did not affect adult human myocardium. The mean from two to four independent preparations was calculated and normalized to the contraction force developed at 0.5 Hz electrical stimulation.

| Substance                | Change in twitch force [%] |         |       |           |
|--------------------------|----------------------------|---------|-------|-----------|
|                          | activity                   | at 1 mM |       | at 0.1 mM |
|                          |                            | minimum | 4 min | minimum   |
| DMSO (0.1 %)             | control                    | -1.8    | -1.2  |           |
| Nonanoic acid            | stable                     | -58.5   | -58.5 | -11.2     |
| 2-Nonenoic acid          | stable                     | -53.0   | -53.0 | -11.9     |
| 4-Methylnonanoic acid    | stable                     | -67.4   | -67.4 | -23.7     |
| Decanoic acid            | stable                     | -54.6   | -54.6 | -6.3      |
| Undecanoic acid          | stable                     | -31.5   | -31.5 | none      |
| Heptanoic acid           | transient                  | -64.8   | -46.6 | -34.4     |
| Hexanoic acid            | transient                  | -44.0   | -13.6 | none      |
| 3-Methyl-2-hexenoic acid | inactive                   | none    | none  | none      |
| Cinnamic acid            | inactive                   | none    | none  | none      |

**Table S3. Summary of fatty acid-sensing receptors expressed in human heart**

| Free fatty acid receptor | adult FPKM | fetal FPKM | Ligand      | Reference                                                                |
|--------------------------|------------|------------|-------------|--------------------------------------------------------------------------|
| <b>OR51E1</b>            | 1.50       | 1.35       | C4:0-C14:0  | present study; Saito <i>et al.</i> , 2009; Adipetro <i>et al.</i> , 2012 |
| GPR84                    | 0.06       | 0.03       | C9:0-C14:0  | Wang <i>et al.</i> , 2006                                                |
| FFAR1                    | 0.00       | 0.00       | >C12:0      | Briscoe <i>et al.</i> , 2006; Itoh <i>et al.</i> , 2005                  |
| FFAR2                    | 0.08       | 0.38       | <C5:0       | Brown <i>et al.</i> , 2003                                               |
| FFAR3                    | 0.06       | 0.07       | <C5:0       | Brown <i>et al.</i> , 2003                                               |
| FFAR4 (O3FAR1)           | 0.07       | 0.25       | C14:0-C18:0 | Hirasawa <i>et al.</i> , 2004                                            |
